# Supplementary material for: Heterogeneity of Size and Toxin Distribution in Aggregatibacter actinomycetemcomitans Outer Membrane Vesicles
Source: MDPI journal article supplement (doi:10.3390/toxins16030138), 2024-03-07
Supplement: s1 [file s1]

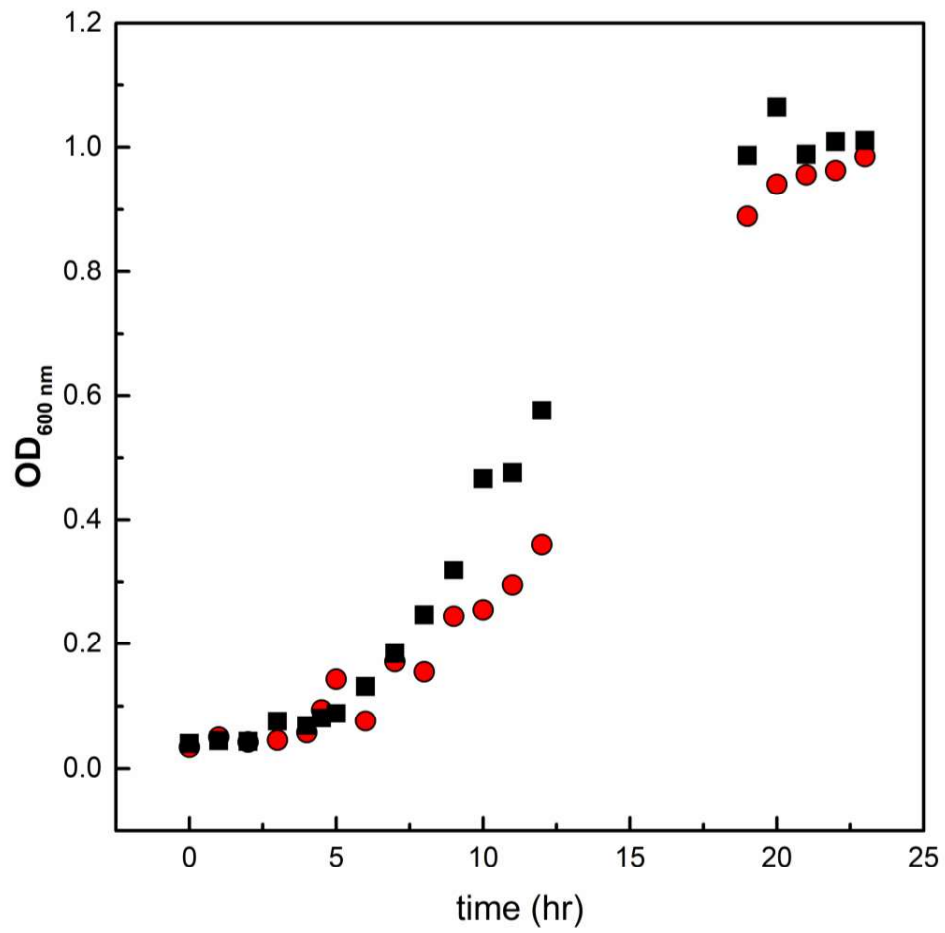

**Figure S1. Representative growth curve of JP2 bacteria and JP2 bacteria in depleted media.** JP2 bacteria were grown normally (black squares). After 6 hr, JP2 bacteria were pelleted and resuspended in depleted, OMV free media (red circles)

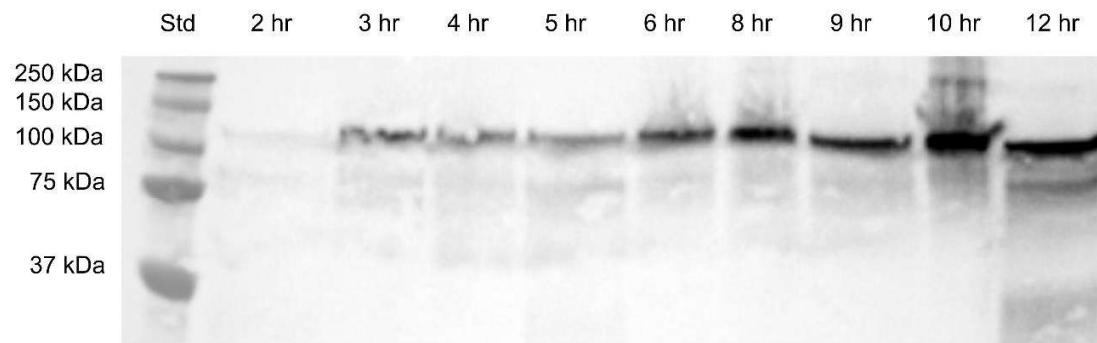

**Figure S2. LtxA content in the supernatant of a JP2 culture.** An aliquot of the JP2 supernatant was removed at the time points noted. The proteins were precipitated using cold ethanol, and the samples were analyzed by Western blot using an anti-LtxA antibody.
